# Supplementary material for: Comparison of actionable events detected in cancer genomes by whole-genome sequencing, in silico whole-exome and mutation panels
Source: PubMed Central journal article supplement (PMC9463385; doi:10.1016/j.esmoop.2022.100540), 2022-07-15
Supplement: mmc1.pdf [file mmc1.pdf]

SUPPLEMENTARY FIGURE 2A

A

| FDA/NCCN-APPROVED "RESPONSIVE" ACTIONABLE VARIANTS |                                |                                 |                                 |                                  |                                |                               |                                |                                  |                                 |                                |                                |                            |                     |                           |                   |     |     |
|----------------------------------------------------|--------------------------------|---------------------------------|---------------------------------|----------------------------------|--------------------------------|-------------------------------|--------------------------------|----------------------------------|---------------------------------|--------------------------------|--------------------------------|----------------------------|---------------------|---------------------------|-------------------|-----|-----|
|                                                    | ONCOGENIC MUTATIONS            |                                 |                                 |                                  |                                |                               |                                |                                  |                                 |                                | COPY NUMBER ABERRATIONS        | GENE FUSIONS               |                     |                           |                   |     |     |
|                                                    | <i>BRAF</i> oncogenic mutation | <i>BRCA1</i> oncogenic mutation | <i>BRCA2</i> oncogenic mutation | <i>DNMT3A</i> oncogenic mutation | <i>EGFR</i> oncogenic mutation | <i>KIT</i> oncogenic mutation | <i>NPM1</i> oncogenic mutation | <i>PDGFRA</i> oncogenic mutation | <i>PTCH1</i> oncogenic mutation | <i>TSC1</i> oncogenic mutation | <i>TSC2</i> oncogenic mutation | <i>ERBB2</i> amplification | <i>FGFR2</i> fusion | <i>NTRK1</i> fusion       | <i>RET</i> fusion |     |     |
| Cutaneous Melanoma                                 | 28.8                           | 2.4                             | 3.2                             | 0.8                              | 0.0                            | 3.2                           | 0                              | 0.8                              | 1.6                             | 2.4                            | 3.2                            | Breast Cancer              | 26.5                | Oesophageal Cancer        | 2.2               | 2.2 | 0   |
| Lung Adenocarcinoma                                | 0.0                            | 0.0                             | 0.0                             | 0.0                              | 22.2                           | 0.0                           | 0                              | 0.0                              | 0.0                             | 0.0                            | 0.0                            | Oesophageal Cancer         | 17.8                | Pancreatic Adenocarcinoma | 0                 | 0   | 0.8 |
| Mucosal Melanoma                                   | 4.1                            | 0                               | 0                               | 0                                | 0.0                            | 10.2                          | 0                              | 0                                | 0                               | 0                              | 0                              | Familial Breast Cancer     | 13.0                | Breast Cancer             | 0                 | 0   | 0   |
| Ovarian Cancer                                     | 0                              | 7.9                             | 3.9                             | 0                                | 0                              | 0                             | 1.3                            | 0                                | 0                               | 0                              | 0                              | Lung Adenocarcinoma        | 11.1                | Lung Adenocarcinoma       | 0                 | 0   | 0   |
| Breast Cancer                                      | 0                              | 2.0                             | 3.1                             | 1.0                              | 0                              | 0                             | 0                              | 0                                | 0                               | 0                              | 0                              | Pancreatic Neuroendocrine  | 10.8                | Familial Breast Cancer    | 0                 | 0   | 0   |
| Oesophageal Cancer                                 | 0                              | 0                               | 0                               | 2.2                              | 0                              | 0                             | 0                              | 0                                | 2.2                             | 0                              | 0                              | Ovarian Cancer             | 5.3                 | Pancreatic Neuroendocrine | 0                 | 0   | 0   |
| Pancreatic Neuroendocrine                          | 0                              | 0                               | 0                               | 0                                | 0                              | 0                             | 0                              | 0                                | 0                               | 1.1                            | 2.2                            | Pancreatic Adenocarcinoma  | 4.5                 | Ovarian Cancer            | 0                 | 0   | 0   |
| Mesothelioma                                       | 0                              | 2.0                             | 0                               | 0                                | 0                              | 0                             | 0                              | 0                                | 0                               | 0                              | 0                              | Mucosal Melanoma           | 2.0                 | Mucosal Melanoma          | 0                 | 0   | 0   |
| Pancreatic Adenocarcinoma                          | 0                              | 0                               | 1.5                             | 0                                | 0                              | 0                             | 0                              | 0                                | 0                               | 0                              | 0                              | Mesothelioma               | 2.0                 | Mesothelioma              | 0                 | 0   | 0   |
| Familial Breast Cancer                             | 0                              | 1.3                             | 0                               | 0                                | 0                              | 0                             | 0                              | 0                                | 0                               | 0                              | 0                              | Cutaneous Melanoma         | 1.6                 | Cutaneous Melanoma        | 0                 | 0   | 0   |

B

| FDA/NCCN-APPROVED "RESISTANT" VARIANTS |                               |                                |                                |
|----------------------------------------|-------------------------------|--------------------------------|--------------------------------|
|                                        | ONCOGENIC MUTATIONS           |                                |                                |
|                                        | <i>KIT</i> oncogenic mutation | <i>KRAS</i> oncogenic mutation | <i>NRAS</i> oncogenic mutation |
| Pancreatic Adenocarcinoma              | 0                             | 89.5                           | 0.8                            |
| Mucosal Melanoma                       | 2.0                           | 2.0                            | 22.4                           |
| Cutaneous Melanoma                     | 0                             | 0.8                            | 24.8                           |
| Ovarian Cancer                         | 0                             | 1.3                            | 1.3                            |
| Familial Breast Cancer                 | 0                             | 0                              | 1.3                            |
| Lung Adenocarcinoma                    | 0                             | 11.1                           | 0                              |
| Mesothelioma                           | 0                             | 0                              | 0                              |
| Pancreatic Neuroendocrine              | 0                             | 0                              | 0                              |
| Breast Cancer                          | 0                             | 0                              | 0                              |
| Oesophageal Cancer                     | 0                             | 0                              | 0                              |
