# Supplementary material for: Comparison of actionable events detected in cancer genomes by whole-genome sequencing, in silico whole-exome and mutation panels
Source: PubMed Central journal article supplement (PMC9463385; doi:10.1016/j.esmoop.2022.100540), 2022-07-15

● MSS ● MSI-H

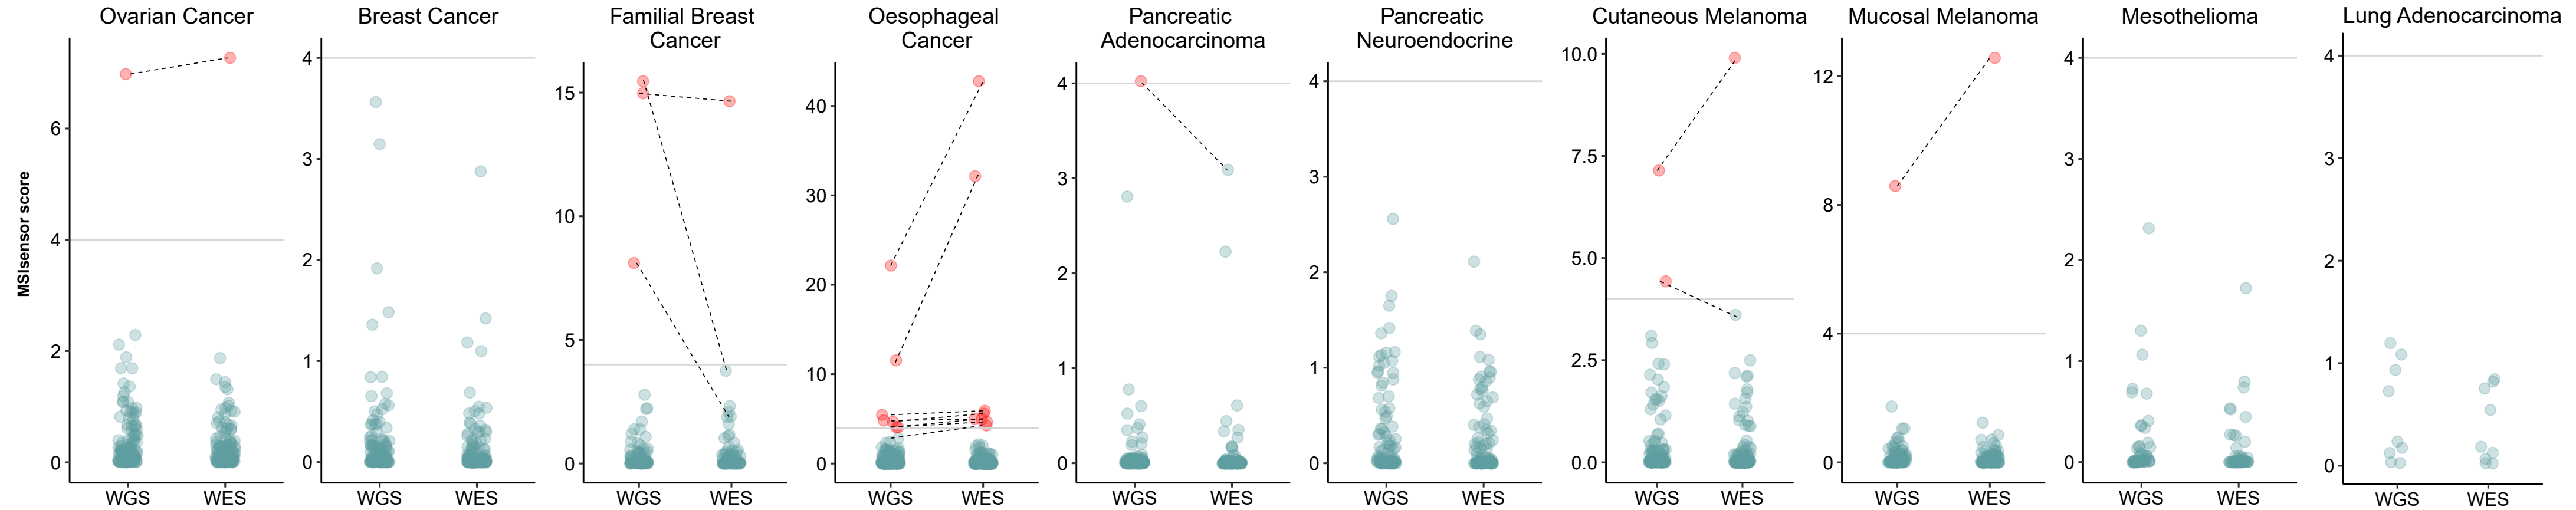

Supplement: mmc2.pdf [file mmc2.pdf]
